# Supplementary material for: Pre-constructing a mortice-tenon joint based-layer to achieve an enhanced SEI on Li metal anode
Source: Royal Society of Chemistry journal article supplement (doi:10.1039/d4ee04617j), 2025-01-01
Supplement: d4ee04617j3.pdf [file d4ee04617j3.pdf]

## Supplementary Information

### Pre-constructing a mortice-tenon joint based-layer to achieve an enhanced SEI on Li metal anode

Kun Wang,<sup>a</sup> Cutao Wang,<sup>a</sup> Sheng Liu,<sup>a</sup> Congcong Du,<sup>b</sup> Qingyi Zheng,<sup>a</sup> Jiaqing Cui,<sup>a</sup> Xinxin Yang,<sup>b</sup> Yuxin Tang,<sup>a</sup> Ruming Yuan,<sup>a</sup> Mingsen Zheng,<sup>a</sup> Jingmin Fan<sup>\*a</sup> and Quanfeng Dong<sup>\*a</sup>

#### Fabrication of the based-layer (DFSA-Li) anode

The fabrication of based-layer anodes was carried out in an argon-filled glove box ( $O_2 < 0.1$  ppm,  $H_2O < 0.1$  ppm). 4 vol% of 2-(Fluorosulphonyl)difluoroacetic acid (DFSA, 98%, Energy-Chemical) was added into dimethyl ether (DME, 99.9%, DoDoChem) to form uniform solutions. Subsequently, 80  $\mu$ L of the above solution was dropped on the surface of a lithium foil (15.6 mm in diameter) for a certain time at room temperature and then washed with DME for over 3 times to remove the remaining DFSA. The prepared based-layer anode was cut into 12 mm discs for further use. The fabrication method for the based-layer on Cu collectors was the same, except that the former used different deposition amounts of Li.

#### Preparation of the electrolyte

Two basic electrolytes were used in this study (FEC-based carbonate electrolyte and commercial carbonate electrolyte). The applied FEC-based carbonate electrolyte was dissolved 1 M lithium hexafluorophosphate ( $LiPF_6$ , 99.9%, DoDoChem) into fluoroethylene carbonate (FEC, 99.9%, DoDoChem) and ethyl methyl carbonate (EMC, 99.9%, DoDoChem) with  $v/v=3:7$ , if not specifically stated. The commercial carbonate electrolyte consisted of 1 M  $LiPF_6$  in ethylene carbonate EC/EMC with  $v/v=3:7$  (LB-224, 99.9%, DoDoChem). For the TSFSA electrolyte, 2 vol% trimethylsilyl 2-(fluorosulphonyl)difluoroacetate (TSFSA, 95%, Leyan) was added into the two basic electrolytes to obtain the TSFSA electrolyte.

#### Material characterization

The SEM images of Li metal were observed by field emission scanning electron microscopy (SEM, HITACHI S-4800). The AFM images were tested by atomic force microscopy (AFM, SPM 5500; Keysight Technologies, Santa Rosa, CA, USA). The contact angles were determined using SL250 contact angle goniometer (U.S. KINO Company). The morphology/HRTEM/SAED/Mapping of SEI was characterized by transmission electron microscope (JEM 200F) with frozen sample rod (Fischione 2550). X-ray diffraction (XRD) was conducted using a Rigaku Ultima IV X-ray diffractometer based on Cu  $K\alpha$  radiation ( $\lambda = 1.5418 \text{ \AA}$ ). Fourier transform infrared spectroscopy (FTIR) experiments were conducted by using a Nicolet i550 FTIR spectrophotometer. X-ray photoelectron spectroscopy (XPS) was obtained by using PHI QUAN-TUM 2000. Time-of-flight secondary ion mass spectrometry was conducted using a PHI nanoTOF II Time-of-Flight SIMS (30 keV, 2 nA, Ion species:  $Bi^{3++}$ ). The contact angles were tested the SL250 contact angle measuring instrument (KINO Company, USA). In-situ optical devices for in-situ optical characterization was designed as shown in Supplementary Fig. S23. The Li foils were used with a thickness of 300  $\mu$ m.

#### Computational Details

The DFT calculations were performed at the B3LYP/6-311+G (d, p) level using Gaussian 09 and

GaussView 5.0 software. EC, EMC, FEC, LiPF<sub>6</sub>, DFSA-Li and TFSFA molecules were optimized using the B3LYP hybrid functional. Ab initio molecular dynamics (AIMD) simulations were carried out by using Perdew-Burke-Ernzerhof (PBE) gradient-corrected exchange-corrected functional with the projector augmented plane wave (PAW) method as implemented in the Vienna ab-initio simulation package (VASP). The plane wave kinetic energy cutoff was set to 400 eV. NVT ensemble was used at 300 K with a time step of 1 fs.

### Electrochemical characterization

For the four research systems, BE was used basic electrolyte without any improvement, based-layer was used DFSA-Li as Li anode and basic electrolyte and ESEI was used based-layer as Li anode and 2 vol% TFSFA as electrolyte. Li|Li symmetric cells (CR-2025 coin cells), Li-Cu half cells (CR-2016 coin cells), Li||LFP full cells (CR-2016 coin cells) and Li||NCM811 full cells (CR-2016 coin cells) were both assembled using a Celgard 2025 separator (19 mm in diameter). The electrolyte was controlled 35  $\mu$ L for each cell. For the Li||LFP coin cells, the mass loading of the LFP cathode was 20.5 mg cm<sup>-2</sup>, and the area capacity of Li anode was deposited 3 mAh cm<sup>-2</sup> and 10 mAh cm<sup>-2</sup> with basic FEC-based electrolyte or TFSFA electrolyte (the above capacities excluded the loss of the chemical reaction). The voltage windows for the Li||LFP full cells were set to 2.5-4.2 V. For the high-voltage Li||NCM811 full cells, the mass loading of the NCM811 cathode was 26.0 mg cm<sup>-2</sup>, and the area capacity of Li anode was deposited 10 mAh cm<sup>-2</sup> with TFSFA electrolyte (the above capacities excluded the loss of the chemical reaction). The voltage windows for the Li||NCM811 full cells were set to 2.8-4.6 V.

Cells galvanostatically charge and discharge tests were used the NEWARE BTS-5 V 5/20 mA (Shenzhen NEWARE). Electrochemical impedance spectra (EIS) were performed by Autolab PGSTAT204 with a test range of 1 MHz to 0.1 Hz. CV and Tafel curves were obtained by an electrochemical workstation (CHI 660E) using coin cells.

To evaluate the average CE of ESEI and based-layer, Cu foil pre-deposited with 1 mAh cm<sup>-2</sup> Li were treated with DFSA and assembled Li-Cu half cells. First, completely stripping the Li metal on Cu foils. Then, redeposited 5 mAh cm<sup>-2</sup> Li on Cu foil at a current density of 1 mA cm<sup>-2</sup> and deposited/stripped 10 times at a capacity of 1 mAh cm<sup>-2</sup>. After n cycles, the remaining Li was completely stripped to the cut-off voltage. The average CE over n cycles can be calculated by measuring the capacity of Li remaining after cycling with the equation:

$$\text{Average CE} = \frac{nQ_C + Q_S}{nQ_C + Q_{Li}} \quad (1)$$

where Q<sub>C</sub> was the deposition and stripping capacity per cycle. Q<sub>S</sub> was the final stripped capacity of Li remaining after n cycles and Q<sub>Li</sub> was the initial deposited capacity of Li. Herein, the value of Q<sub>Li</sub> was 5 mAh cm<sup>-2</sup> and Q<sub>C</sub> was 1 mAh cm<sup>-2</sup>.

The method to obtain the activation energy (E<sub>a</sub>) of Li deposition was as follows. EIS tests with Li|Li symmetric cells at different temperatures were carried out. E<sub>a</sub> can be obtained by the following equation:

$$\frac{1}{R_{SEI}} = A_0 e^{-E_a/RT} \quad (2)$$

where R<sub>SEI</sub>, A<sub>0</sub> and R represent the resistance of SEI, pre-exponential constant, the standard gas constant and the activation energy, respectively. Therefore, E<sub>a</sub> can be obtained from the slope plot of log R<sub>SEI</sub> vs. T<sup>-1</sup>.

To obtain the lithium-ion diffusion coefficient of BE, based-layer and ESEI, CV tests were conducted at different scan speeds (0.1 mV s<sup>-1</sup>-0.5 mV s<sup>-1</sup>) using the Li | LFP full cells. The lithium-ion diffusion coefficient was obtained by fitting the Randles-Sevcik equation:

$$I_p = 0.4463nFAC_xv^{1/2} \sqrt{\frac{nFD_x}{RT}} \quad (3)$$

where  $I_p$ ,  $n$ ,  $A$ ,  $D_x$ ,  $v$  and  $C_x$  represent peak current, number of electrons in electrode reaction, electrode area, ion diffusion coefficient, scan rate and lithium-ion concentration.

## Supplementary Figures

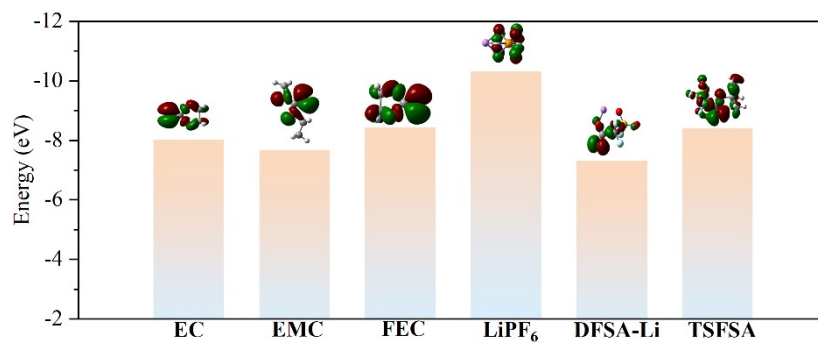

**Fig. S1.** HOMO energy level diagrams of the investigated salts (LiPF<sub>6</sub>), solvents (EC, EMC and FEC), DFSA-Li and TSFSA.

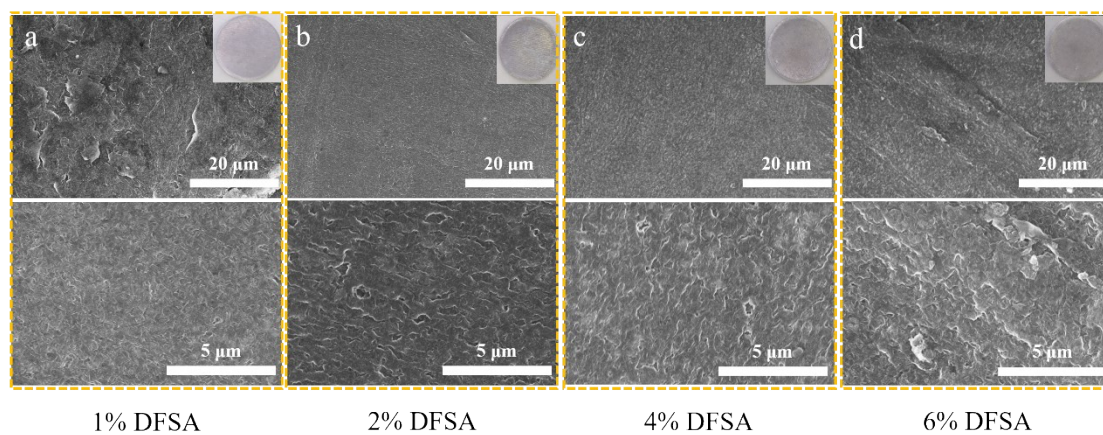

**Fig. S2.** The SEM images of DFSA-Li surface with different treatment concentration: (a) 1%, (b) 2%, (c) 4% and (d) 6%.

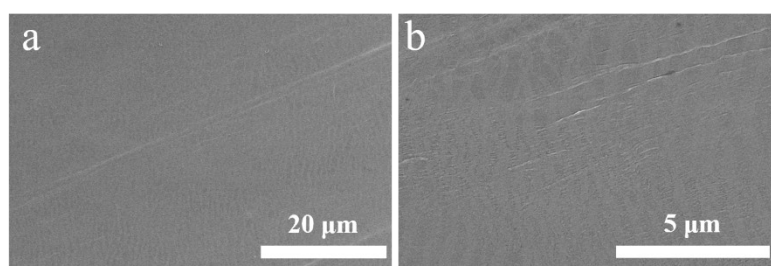

**Fig. S3.** The SEM images of Bare-Li surface.

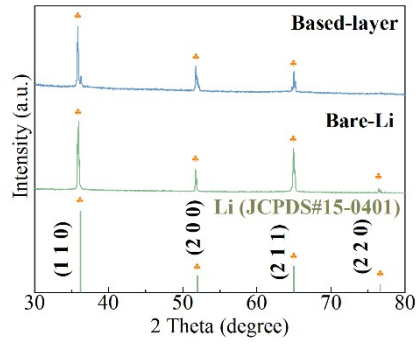

**Fig. S4.** XRD patterns of based-layer and bare-Li.

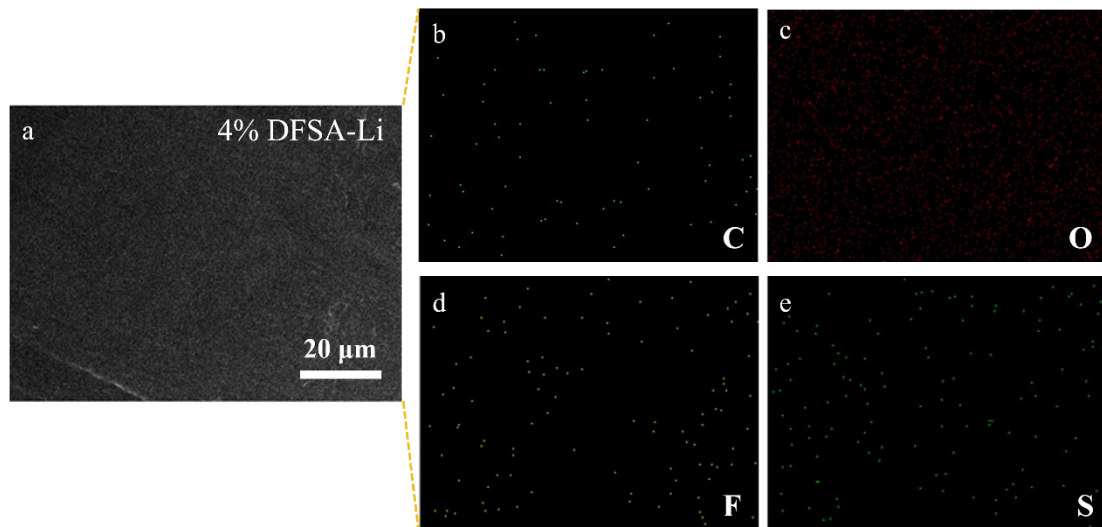

**Fig. S5.** (a) The SEM images of the surface of based-layer. (b-e) The corresponding energy dispersive spectroscopy (EDS) mapping (carbon, oxygen, fluorine and sulfur) in the same area.

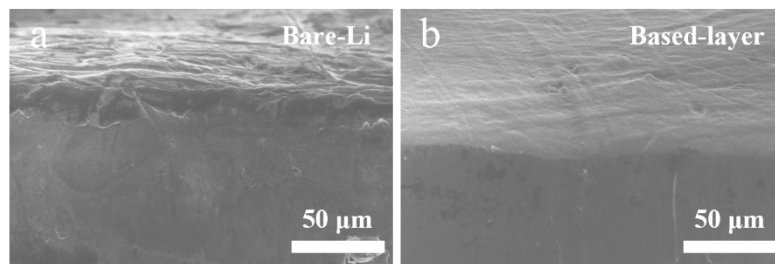

**Fig. S6.** The cross-sectional SEM images of (a) Bare-Li and (b) based-layer.

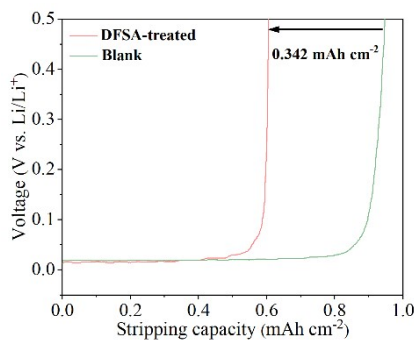

**Fig. S7.** Capacity-voltage curves of Li | Cu half cells with DFSA-treated Li on Cu foil and bare Cu foil. To determine the active Li capacities consumed by the displacement reaction, a Cu electrode pre-deposited with  $1 \text{ mAh cm}^{-2}$  of Li metal was selected as the target for the reaction. After reassembling the Li | Cu half-cell, all stripped Li capacity was  $0.604 \text{ mAh cm}^{-2}$ , indicating that approximately  $0.342 \text{ mAh cm}^{-2}$  of active Li was consumed by DFSA (4%). This consumption has a negligible impact on energy densities.

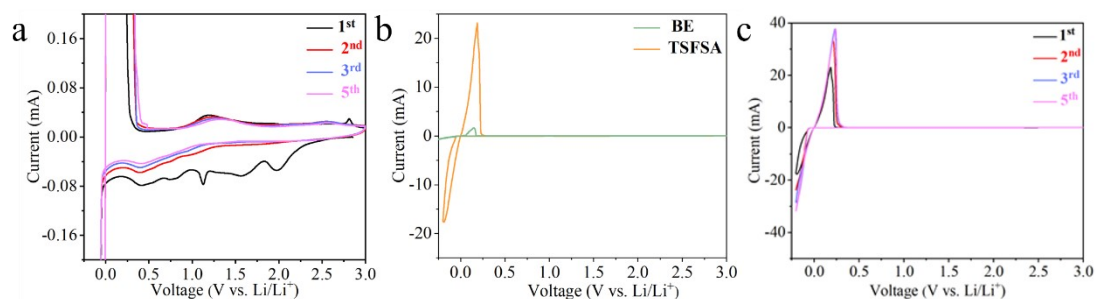

**Fig. S8.** (a) CV profiles scanned at  $-0.2\text{-}3 \text{ V}$  of  $1 \text{ mV s}^{-1}$  in TSFSA electrolyte. (b) The first cycle CV profiles of BE and TSFSA with FEC-based carbonate electrolyte ( $1 \text{ M LiPF}_6$  in FEC/EMC,  $v/v=3:7$ ). (c) CV profiles scanned at  $-0.2\text{-}3 \text{ V}$  of  $1 \text{ mV s}^{-1}$  in TSFSA electrolyte.

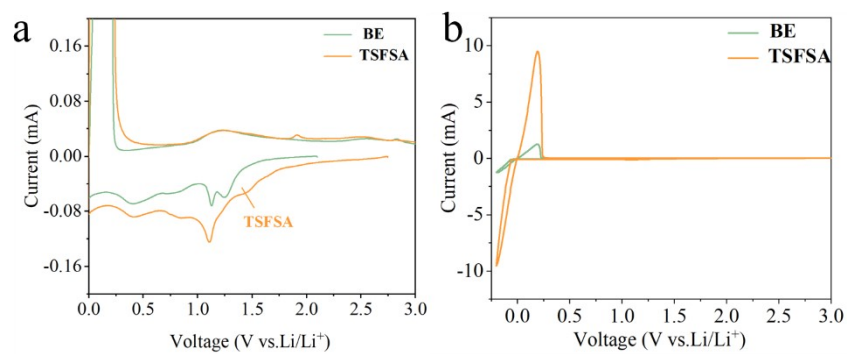

**Fig. S9.** The first cycle CV profiles of BE and TSFSA in commercial carbonate electrolyte (1 M LiPF<sub>6</sub> in EC/EMC, v/v=3:7).

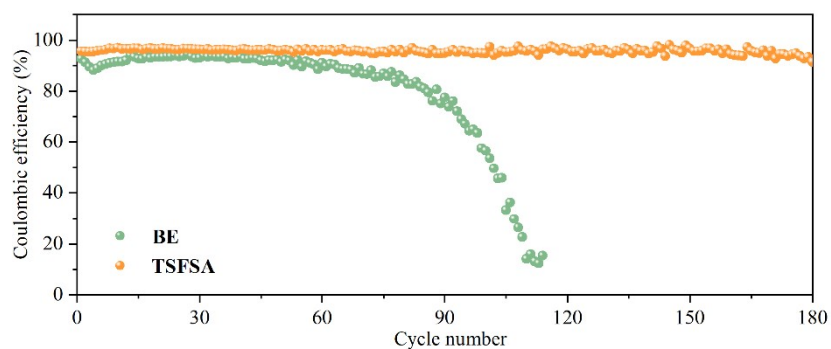

**Fig. S10.** Coulombic efficiency (CE) of Li||Cu half cells at a current density of 1 mA cm<sup>-2</sup> and a capacity of 1 mAh cm<sup>-2</sup>.

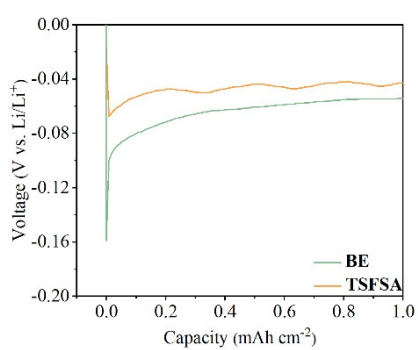

**Fig. S11.** Nucleation overpotential comparison of BE and TSFSA using Li||Cu half cells at a current density of 1 mA cm<sup>-2</sup>.

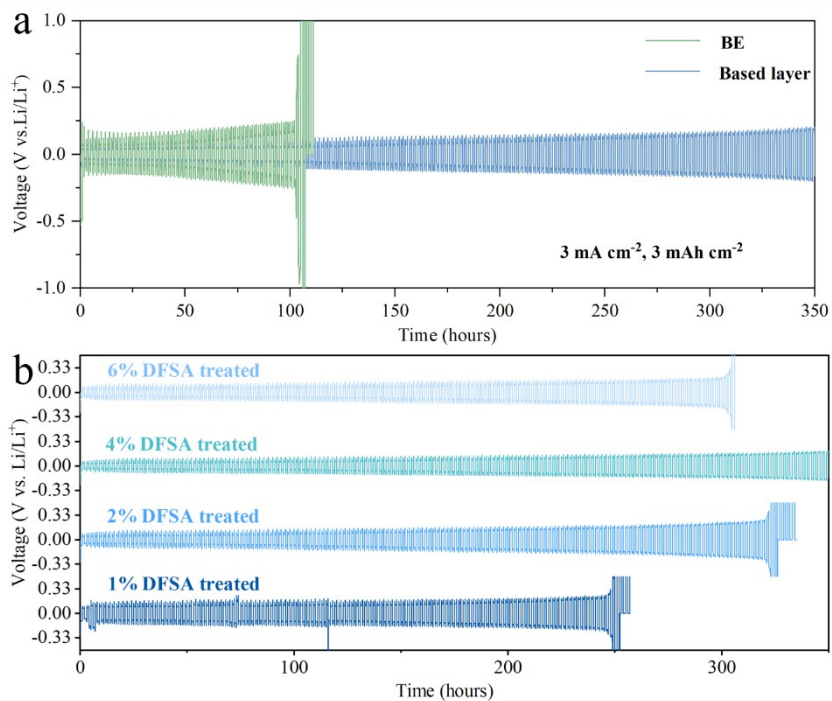

**Fig. S12.** (a) Cycle stability of Li | Li symmetric cells with BE and based-layer at a current density of  $3 \text{ mA cm}^{-2}$  and a capacity of  $3 \text{ mAh cm}^{-2}$ . (b) Cycle stability of Li | Li symmetric cells at a current density of  $3 \text{ mA cm}^{-2}$  and a capacity of  $3 \text{ mAh cm}^{-2}$  with different treatment concentration.

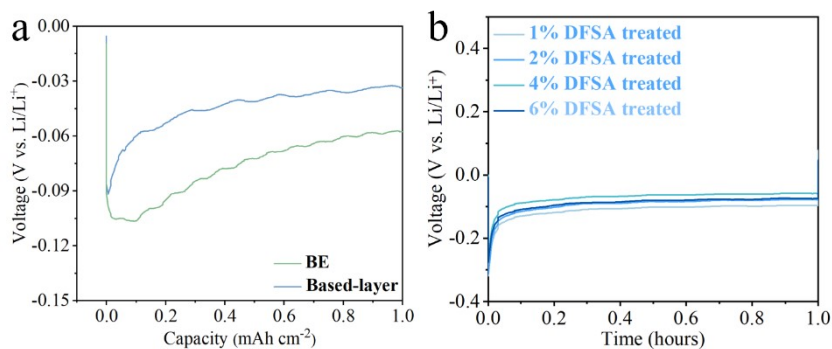

**Fig. S13.** (a) Nucleation overpotential comparison of BE and based-layer using Li | Li symmetric cells at a current density of  $0.5 \text{ mA cm}^{-2}$ . (b) Nucleation overpotential comparison of based-layer with different treatment concentration at a current density of  $3 \text{ mA cm}^{-2}$ .



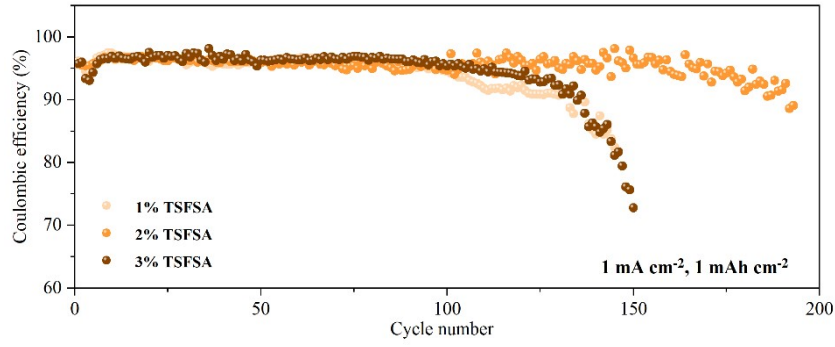

**Fig. S14.** Coulombic efficiency (CE) of Li||Cu half cells with different TSFSA concentration at a current density of  $1 \text{ mA cm}^{-2}$  and a capacity of  $1 \text{ mAh cm}^{-2}$ .

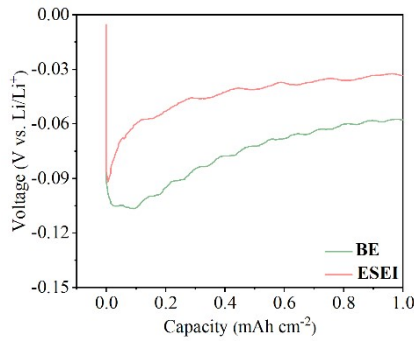

**Fig. S15.** Nucleation overpotential comparison of BE and ESEI using Li||Li symmetric cells at a current density of  $0.5 \text{ mA cm}^{-2}$ .

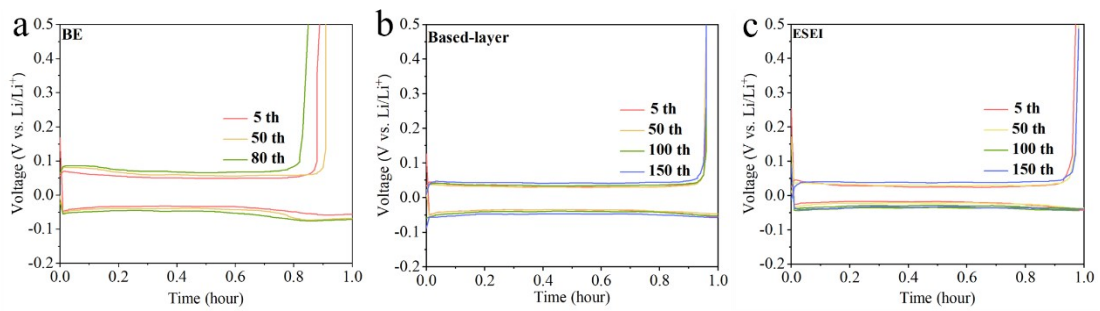

**Fig. S16.** Voltage-time curves of Li||Cu half cells with (a) BE, (b) based-layer and (c) ESEI.

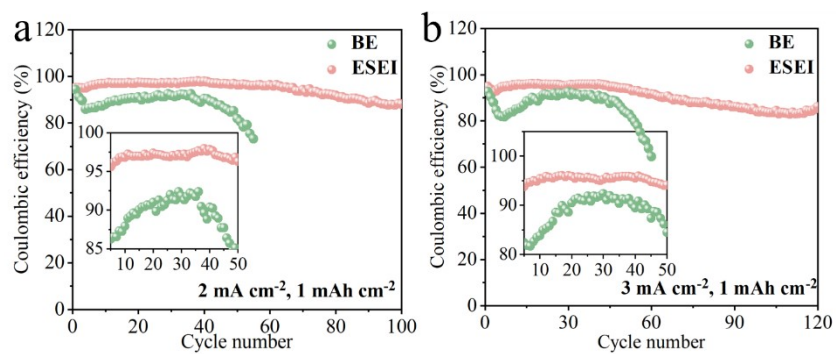

**Fig. S17.** The CE in BE and ESEI using Li||Cu cells of 1 mAh cm<sup>-2</sup> with (a) 2 mA cm<sup>-2</sup>, (b) 3 mA cm<sup>-2</sup>.

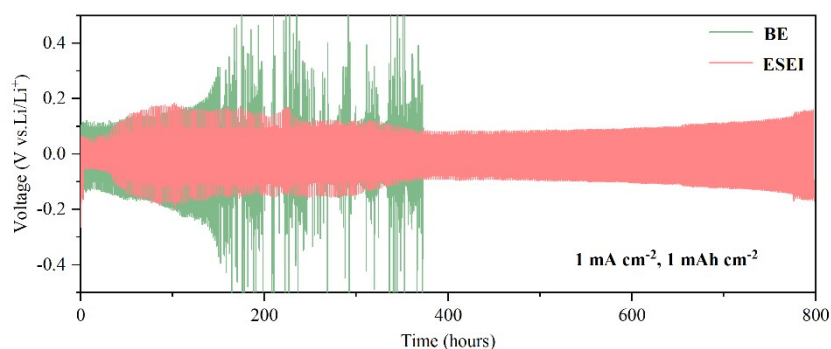

**Fig. S18.** Cycle stability of Li||Li symmetric cells with BE and ESEI at a current density of 1 mA cm<sup>-2</sup> and a capacity of 1 mAh cm<sup>-2</sup> in commercial carbonate electrolyte (1 M LiPF<sub>6</sub> in EC/EMC, v/v=3:7).

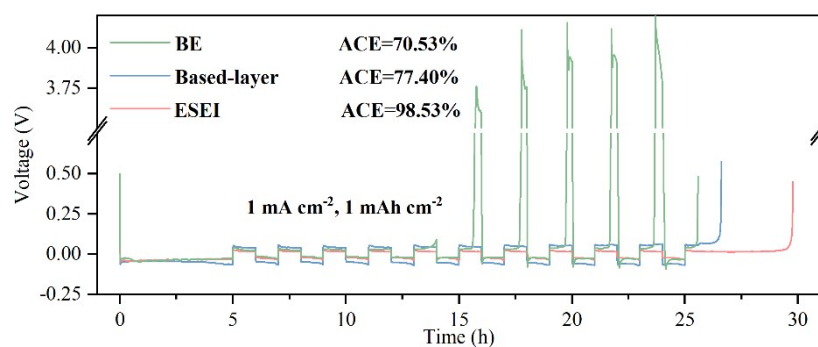

**Fig. S19.** Li metal plating/stripping average CE evaluated by Li||Cu half cells in commercial carbonate electrolyte (1 M LiPF<sub>6</sub> in EC/EMC, v/v=3:7).

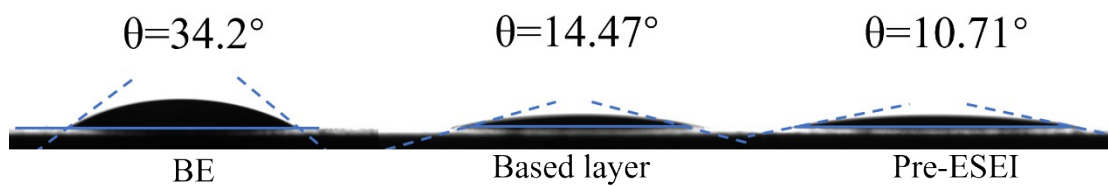

**Fig. S20.** Contact angle measurements of BE, based-layer and pre-ESEI.

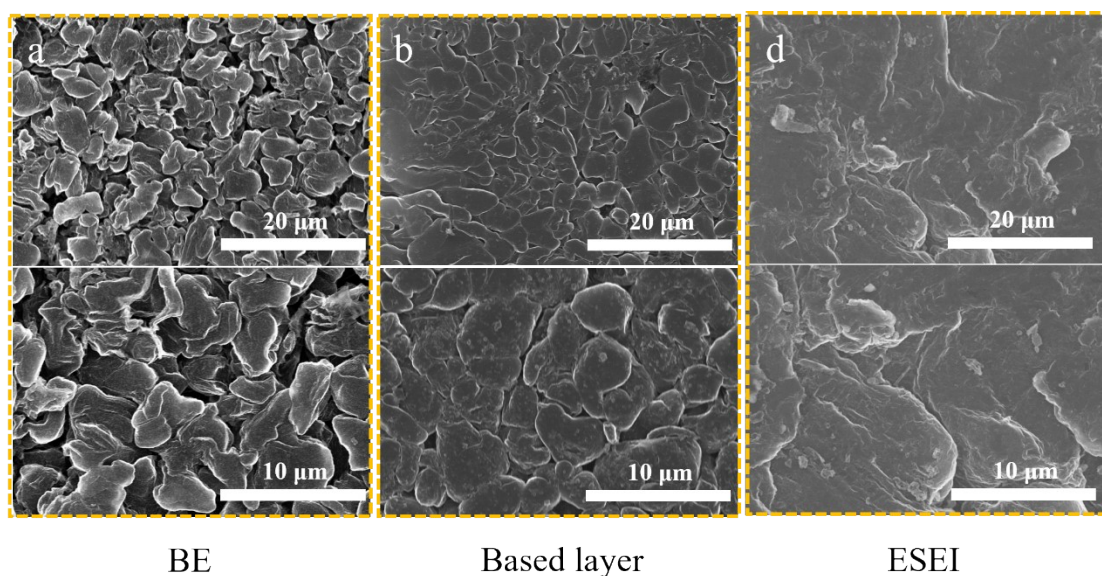

**Fig. S21.** SEM images of (a) BE, (b) based-layer and (c) ESEI at 10th plating.

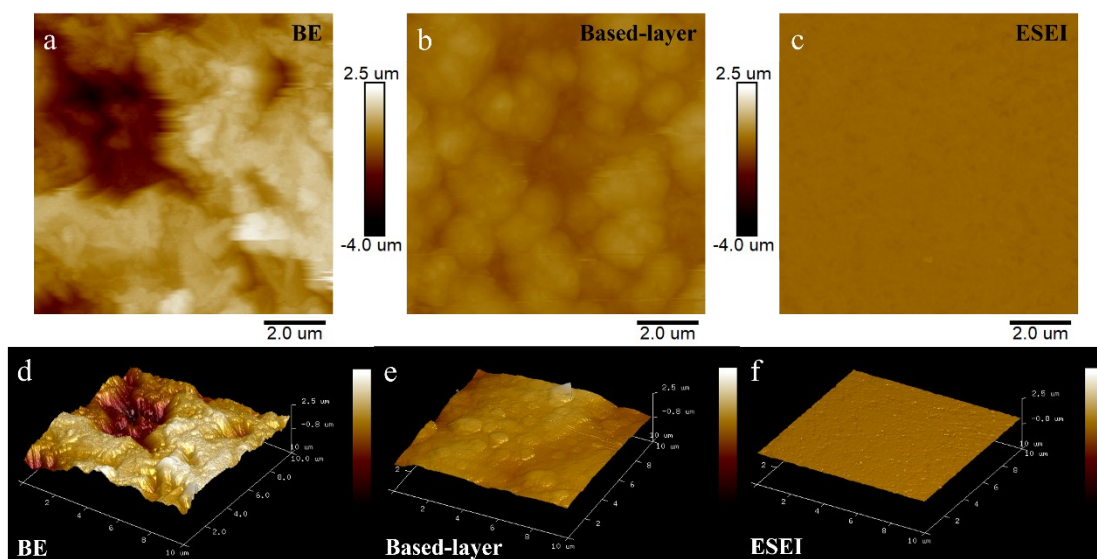

**Fig. S22.** AFM images of Li surface morphology at 10th plating of (a) BE (b) based-layer and (c) ESEI with an area of  $10\mu\text{m}\times 10\mu\text{m}$ . The Corresponding 3D AFM model images of Li surface morphology at 10th plating of (d) BE (e) based-layer and (f) ESEI with an area of  $10\mu\text{m}\times 10\mu\text{m}$ . Color bars :-4-2.5  $\mu\text{m}$ .

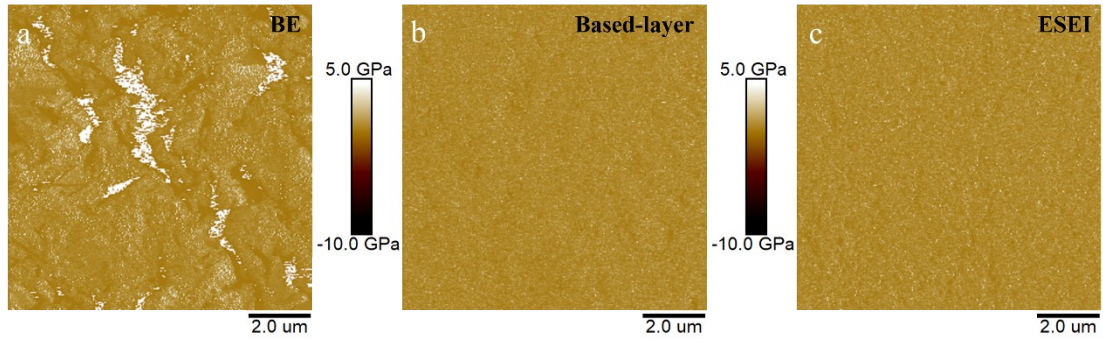

**Fig. S23.** The Corresponding Young's modulus mapping of (a) BE (b) based-layer and (c) ESEI with an area of  $10\mu\text{m}\times 10\mu\text{m}$ . Color bars :-10-5 Gpa.

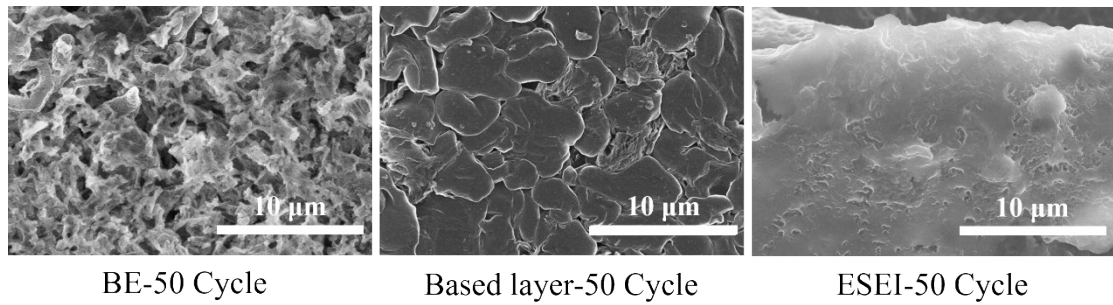

**Fig. S24.** SEM images of (a) BE, (b) based-layer and (c) ESEI at 50th plating.

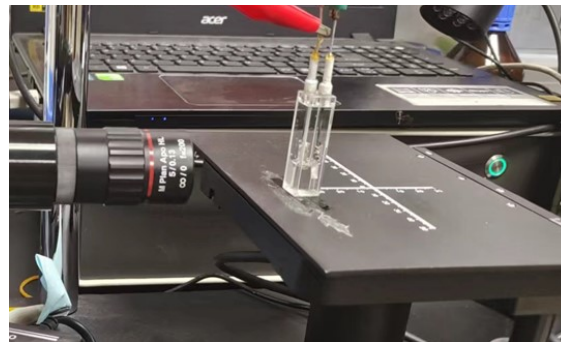

**Fig. S25.** In-situ optical devices for in-situ optical characterization.

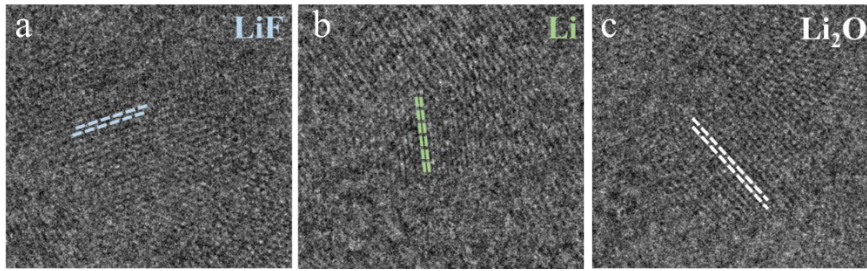

Fig. S26. The enlarged detail views of Fig. 4g.

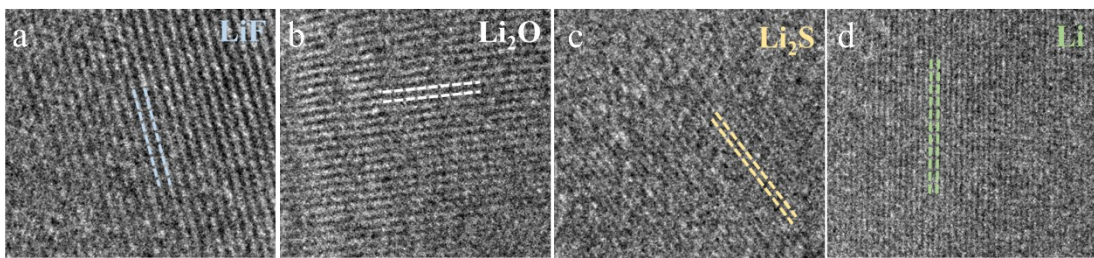

Fig. S27. The enlarged detail views of Fig. 4i.

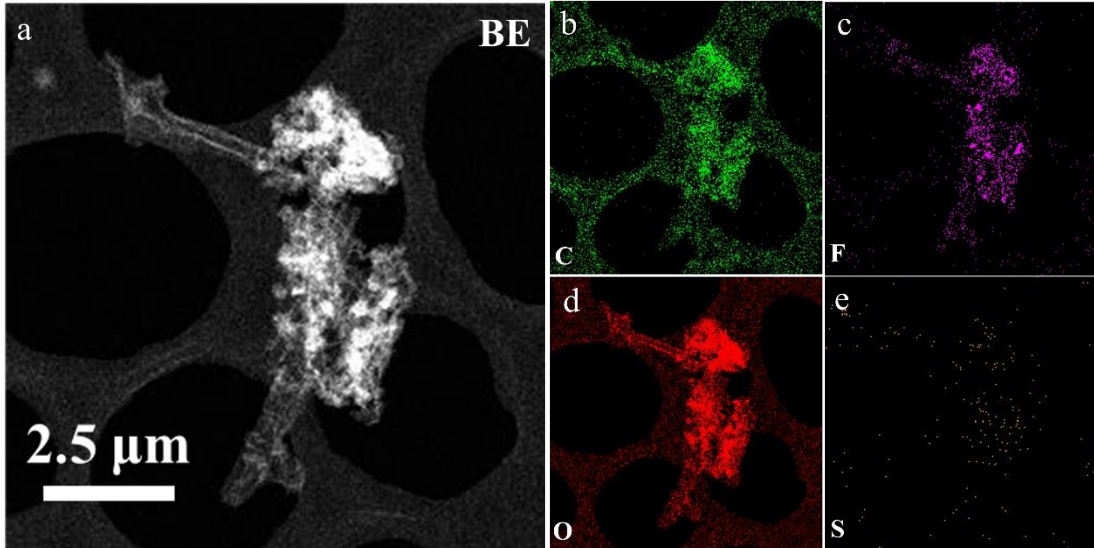

Fig. S28. The HAADF-STEM image and elemental mapping of BE in Li||Li symmetric cell after 5 cycles.

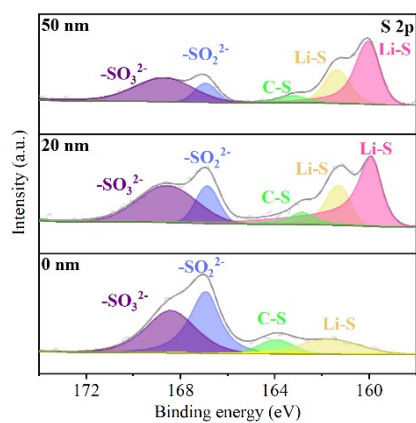

**Fig. S29.** XPS S 2p spectra for ESEI cycled after 5 cycles.

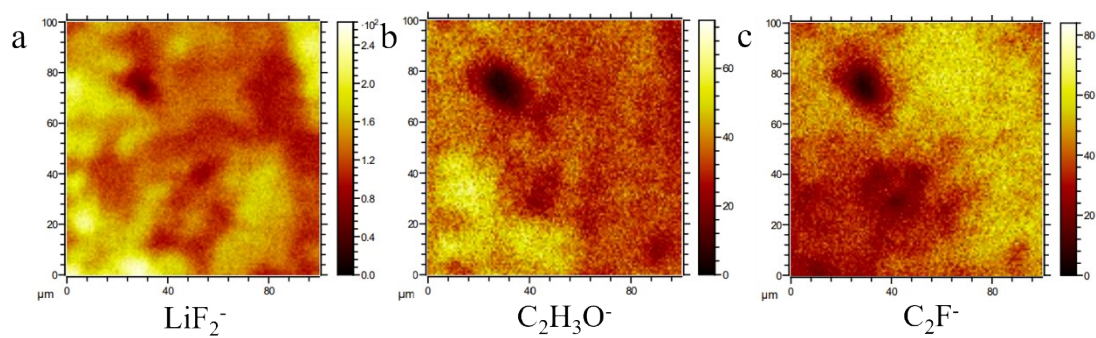

**Fig. S30.** TOF-SIMS mappings of the (a)  $\text{LiF}_2^-$ , (b)  $\text{C}_2\text{H}_3\text{O}^-$  and (c)  $\text{C}_2\text{F}^-$  species on the surface of the cycled BE batteries.

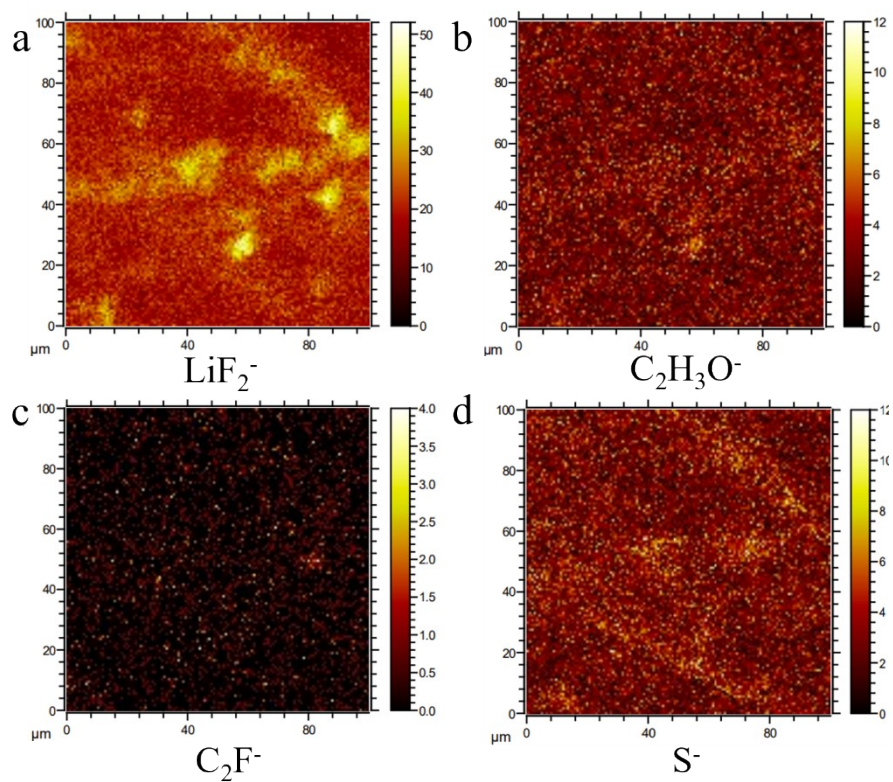

**Fig. S31.** TOF-SIMS mappings of the (a)  $\text{LiF}_2^-$ , (b)  $\text{C}_2\text{H}_3\text{O}^-$ , (c)  $\text{C}_2\text{F}^-$  and (d)  $\text{S}^-$  species on the surface of the cycled ESEI batteries.

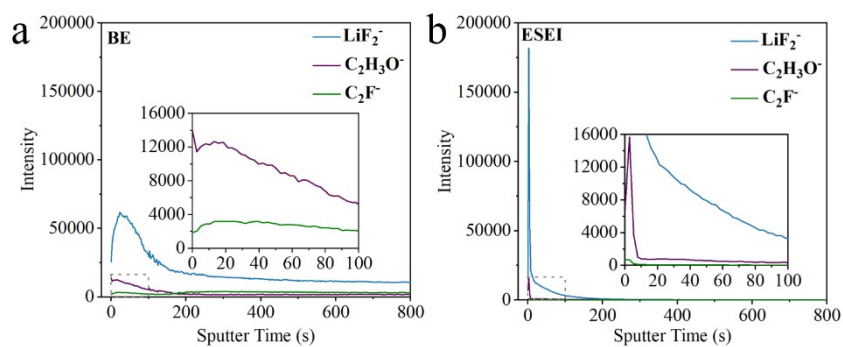

**Fig. S32.** The TOF-SIMS depth sputter curves of Li surface for (a) BE and (b) ESEI.

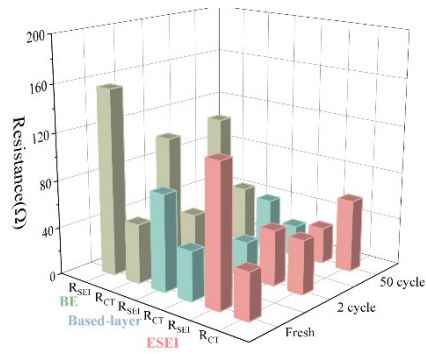

**Fig. S33.** The EIS fitting results of Li || Li symmetric cells.

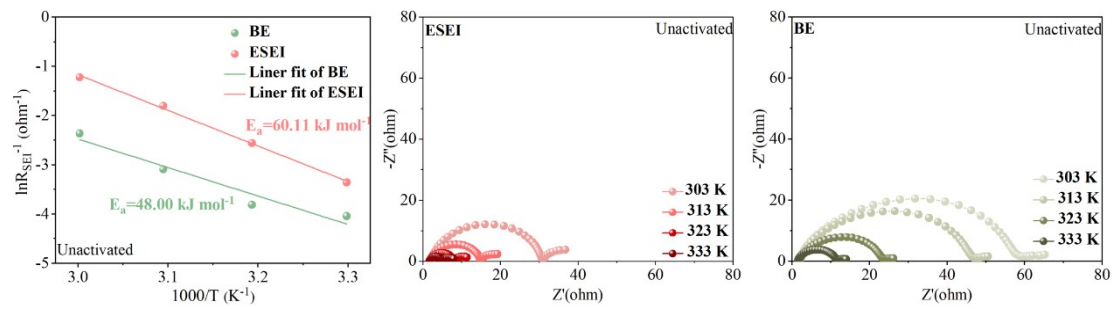

**Fig. S34.** (a) The Arrhenius behavior and corresponding unactivation energy for  $\text{Li}^+$  diffusion through activated SEI film derived from  $R_{\text{SEI}}$  in Nyquist plots at various temperatures of fresh Li || Li symmetric cells with BE and ESEI. EIS plots of the Li || Li symmetric cells with (b) ESEI and (c) BE at different temperatures before cycling.

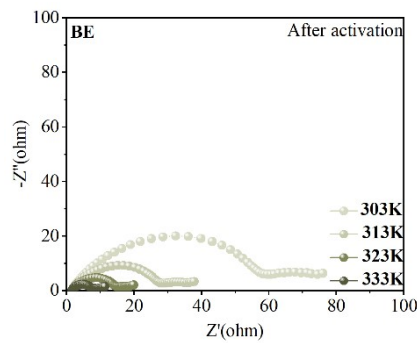

**Fig. S35.** EIS plots of the Li || Li symmetric cells with BE at different temperatures after cycling.

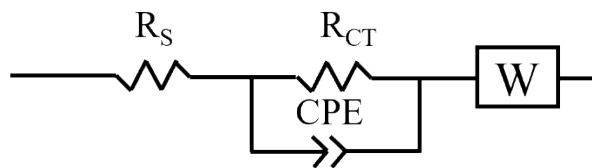

**Fig. S36.** The equivalent circuit used to fit the Li || Li symmetric cells.



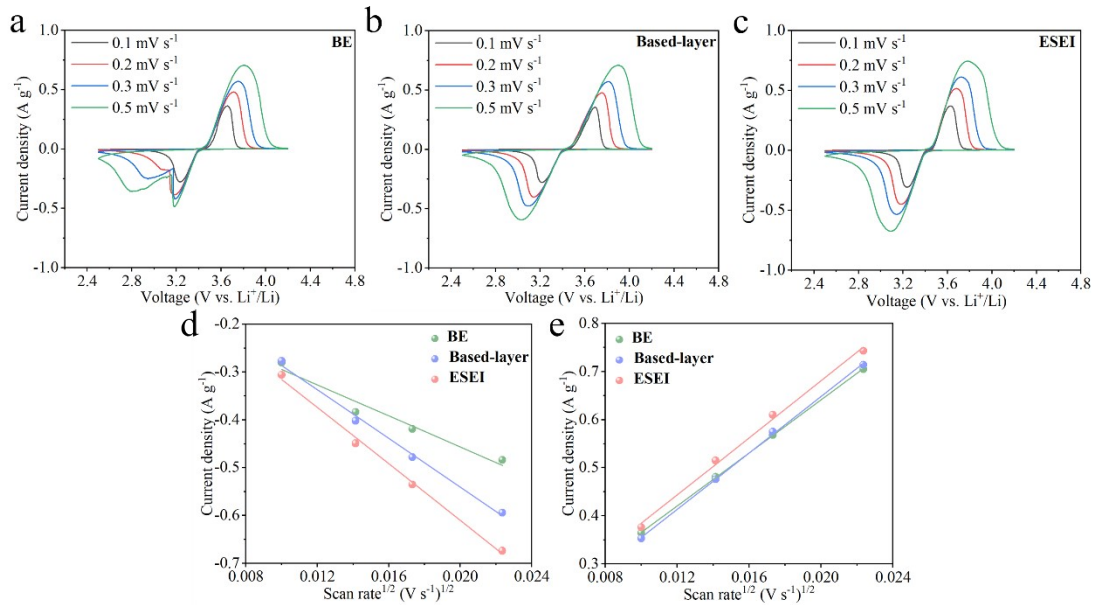

**Fig. S37.** The CV curves of Li || LFP full cells with (a) BE, (b) based-layer and (c) ESEI at different scan rates (0.1-0.5 mV s<sup>-1</sup>) after two cycles activation. (d) Reduction peaks and (e) oxidation peaks currents against square root of scan rates for BE, Based-layer and ESEI.

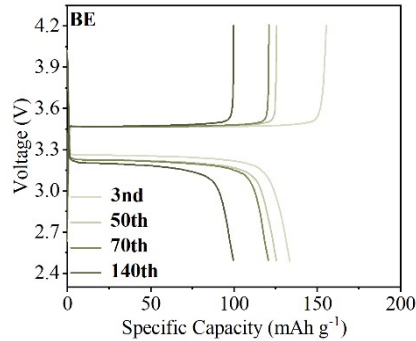

**Fig. S38.** Charge-discharge profiles of Li || LFP full cells with BE under a N/P of 2.98.

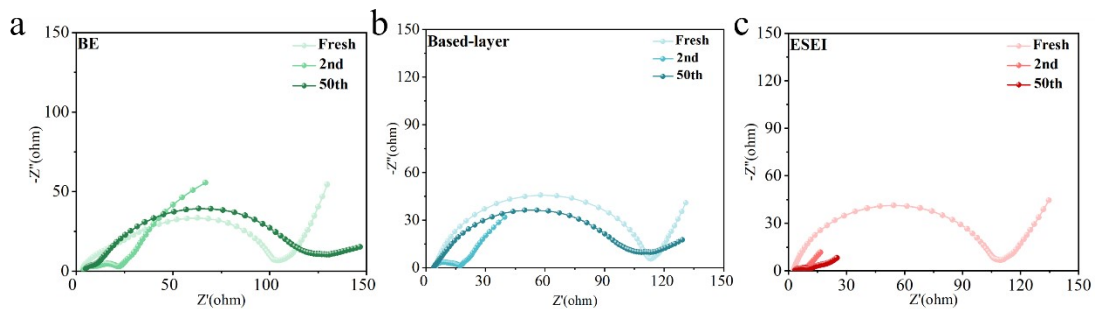

**Fig. S39.** Nyquist plots of Li || LFP full cells at various cycles for (a) BE, (b) based-layer and (c) ESEI.

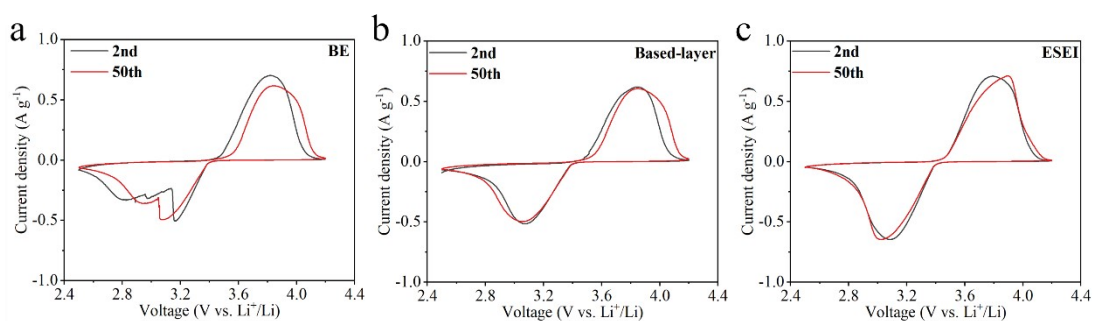

**Fig. S40.** The CV curves of Li || LFP full cells at two cycles activation and 50 cycles for (a) BE, (b) based-layer and (c) ESEI.

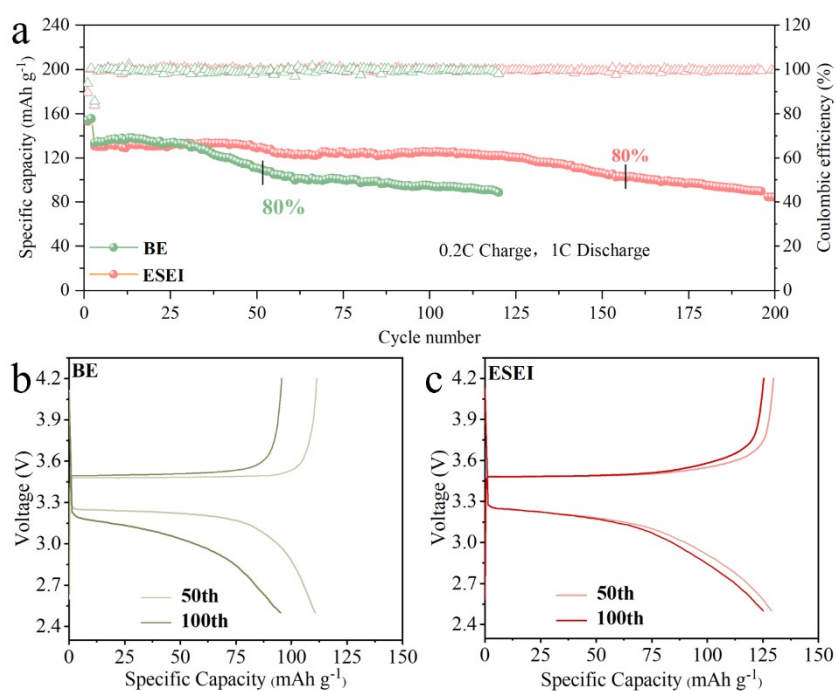

**Fig. S41.** (a) Long-cycling performance of the Li || LFP full cells in commercial carbonate electrolyte (1 M LiPF<sub>6</sub> in EC/EMC, v/v=3:7). The mass loading of LFP is  $\sim 20.5 \text{ mg cm}^{-2}$  and the thickness of Li chip is 300  $\mu\text{m}$ . Charge-discharge voltage profiles of the Li || LFP full cells with (b) ESEI and (c) BE. The mass loading of LFP is  $\sim 20.5 \text{ mg cm}^{-2}$  and the thickness of Li chip is 300  $\mu\text{m}$ .

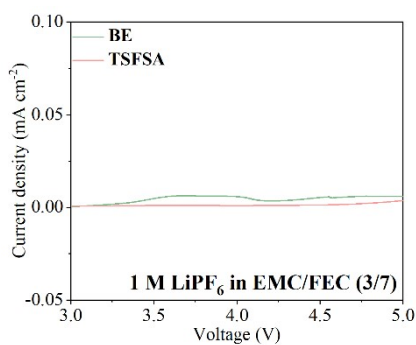

**Fig. S42.** The LSV curves of BE and TSFSA electrolyte with  $1\text{mV s}^{-1}$ .

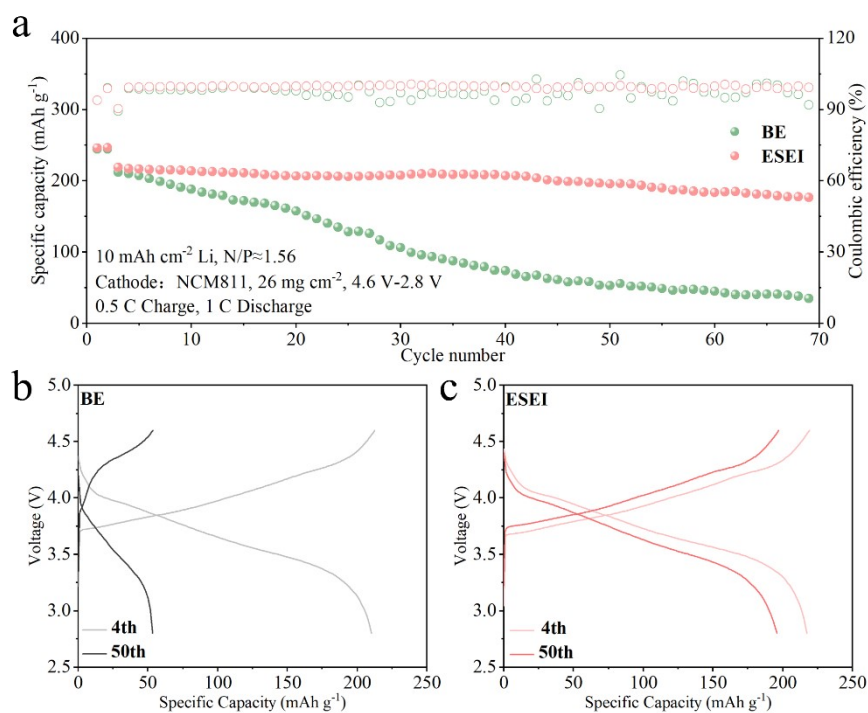

**Fig. S43.** (a) Long-term cycling performance of high voltage Li || NCM811 full cells with BE and ESEI in a  $1\text{ M LiPF}_6$  in FEC/EMC ( $v/v = 3:7$ ) electrolyte. Conditions:  $10\text{ mAh cm}^{-2}$  deposited Li, high area loading NCM811 ( $6.4\text{ mAh cm}^{-2}$  at  $0.1\text{C}$ ,  $26\text{ mg cm}^{-2}$ ),  $2.8\text{ V}-4.6\text{ V}$ . The cells were activated at  $0.1\text{ C}$  for 2 cycles, then charged at  $0.5\text{ C}$  and discharged at  $1\text{ C}$  in subsequent cycles ( $1\text{C}=200\text{ mA g}^{-1}$ ). The corresponding charge-discharge profiles of the high voltage Li || LFP NCM811 cells with (b) BE and (c) ESEI.

**Table S1.** Cycling stability of ESEI compared with previously reported work.

| Electrolyte                                                           | Method                                            | Current density (mA cm <sup>-2</sup> ) | Areal capacity (mAh cm <sup>-2</sup> ) | Cycling time (h)  | Ref.          |
|-----------------------------------------------------------------------|---------------------------------------------------|----------------------------------------|----------------------------------------|-------------------|---------------|
| 1 M LiPF <sub>6</sub><br>EC/EMC+TSFSA                                 | chemical reaction +<br>electrochemical activation | 1                                      | 1                                      | 800               | This work     |
| 1 M LiPF <sub>6</sub><br>EMC/FEC+TSFSA                                | chemical reaction +<br>electrochemical activation | 1<br>3                                 | 1<br>3                                 | 2100<br>450       | This work     |
| 1 M LiPF <sub>6</sub> EC/DEC                                          | Artificial SEI                                    | 0.5<br>1                               | 1<br>1                                 | 2325<br>850       | <sup>1</sup>  |
| 1 M LiPF <sub>6</sub><br>EC/EMC/FEC                                   | Artificial SEI                                    | 1                                      | 0.5                                    | 1200              | <sup>2</sup>  |
| 1 M LiPF <sub>6</sub> EC/DEC                                          | Artificial SEI                                    | 1                                      | 1                                      | 750               | <sup>3</sup>  |
| 1 M LiPF <sub>6</sub><br>EC/DEC/FEC/VC                                | Artificial SEI                                    | 1                                      | 1                                      | 450               | <sup>4</sup>  |
| 1 M LiPF <sub>6</sub><br>EC/DMC/FEC                                   | Artificial SEI                                    | 0.5                                    | 1                                      | 950               | <sup>5</sup>  |
| 1 M LiPF <sub>6</sub> EC/DMC                                          | Artificial SEI                                    | 0.5                                    | 1                                      | 320               | <sup>5</sup>  |
| 1 M LiPF <sub>6</sub><br>EC/DEC/FEC/VC                                | Artificial SEI                                    | 1<br>2<br>4                            | 1<br>1<br>1                            | 800<br>250<br>150 | <sup>6</sup>  |
| 1.3 M LiPF <sub>6</sub><br>EC/DEC/FEC                                 | Artificial SEI                                    | 0.5                                    | 2                                      | 800               | <sup>7</sup>  |
| 1 M LiPF <sub>6</sub><br>EC/DEC/DMC                                   | Artificial SEI                                    | 0.5                                    | 1                                      | 400               | <sup>8</sup>  |
| 1 M LiPF <sub>6</sub> EC/DEC/FEC                                      | Artificial SEI                                    | 1<br>3                                 | 1<br>3                                 | 400<br>80         | <sup>9</sup>  |
| 1 M LiPF <sub>6</sub> EC/DEC                                          | Artificial SEI                                    | 1<br>2                                 | 1<br>1                                 | 900<br>400        | <sup>10</sup> |
| 1 M LiPF <sub>6</sub> FEC/DMC                                         | Artificial SEI                                    | 0.5<br>1                               | 1<br>1                                 | 1800<br>800       | <sup>11</sup> |
| 1 M LiPF <sub>6</sub> EC/DEC/FEC                                      | Additive                                          | 1                                      | 1                                      | 1200              | <sup>12</sup> |
| 1 M LiPF <sub>6</sub><br>EC/DEC+EITC                                  | Additive                                          | 0.5                                    | 0.5                                    | 600               | <sup>13</sup> |
| 1 M LiPF <sub>6</sub><br>EC/EMC+TMSILN                                | Additive                                          | 1                                      | 1                                      | 550               | <sup>14</sup> |
| 1 M LiPF <sub>6</sub><br>EC/DMC+HFAC                                  | Additive                                          | 1                                      | 0.5                                    | 500               | <sup>15</sup> |
| 1 M LiPF <sub>6</sub><br>EC/DEC+DETFP                                 | Additive                                          | 2                                      | 2                                      | 250               | <sup>16</sup> |
| 1 M LiPF <sub>6</sub><br>EC/DEC/FEC+<br>RbNO <sub>3</sub> +18-Crown-6 | Additive                                          | 1<br>3                                 | 1<br>1                                 | 250<br>140        | <sup>17</sup> |
| 1 M LiPF <sub>6</sub><br>EC/DEC+ KSeCN                                | Additive                                          | 1                                      | 3                                      | 120               | <sup>18</sup> |
| 1 M LiPF <sub>6</sub><br>EC/DMC/FEC<br>+DIDP+TMSF+ LiNO <sub>3</sub>  | Additive                                          | 1                                      | 1                                      | 500               | <sup>19</sup> |

**Table S2.** AFM characterization of average root-mean-square roughness at 10th plating of BE, Based-layer and ESEI with an area of 10 $\mu\text{m}$ ×10 $\mu\text{m}$ .

| Average roughness | BE (nm) | Based-layer (nm) | ESEI (nm) |
|-------------------|---------|------------------|-----------|
| R <sub>q</sub>    | 718.0   | 217.0            | 30.1      |
| R <sub>a</sub>    | 561.0   | 176.0            | 22.6      |

**Table S3.** The specific values of R<sub>SEI</sub> of Li | Li symmetric cells at various temperatures for BE with unactivated.

| T (K) | R <sub>SEI</sub> ( $\Omega$ ) | ln (1/ R <sub>SEI</sub> ) | 1000/T (K <sup>-1</sup> ) |
|-------|-------------------------------|---------------------------|---------------------------|
| 303   | 56.89                         | -4.04107                  | 3.2987                    |
| 313   | 45.35                         | -3.81441                  | 3.19336                   |
| 323   | 22.06                         | -3.09377                  | 3.09454                   |
| 333   | 10.63                         | -2.36368                  | 3.00165                   |

**Table S4.** The specific values of R<sub>SEI</sub> of Li | Li symmetric cells at various temperatures for ESEI with unactivated.

| T (K) | R <sub>SEI</sub> ( $\Omega$ ) | ln (1/ R <sub>SEI</sub> ) | 1000/T (K <sup>-1</sup> ) |
|-------|-------------------------------|---------------------------|---------------------------|
| 303   | 28.68                         | -3.35634                  | 3.2987                    |
| 313   | 12.90                         | -2.55754                  | 3.19336                   |
| 323   | 6.06                          | -1.80171                  | 3.09454                   |
| 333   | 3.40                          | -1.22378                  | 3.00165                   |

**Table S5.** The specific values of R<sub>SEI</sub> of Li | Li symmetric cells at various temperatures for BE with activated.

| T (K) | R <sub>SEI</sub> ( $\Omega$ ) | ln (1/ R <sub>SEI</sub> ) | 1000/T (K <sup>-1</sup> ) |
|-------|-------------------------------|---------------------------|---------------------------|
| 303   | 58.44                         | -4.06800                  | 3.2987                    |
| 313   | 27.33                         | -3.30798                  | 3.19336                   |
| 323   | 13.91                         | -2.63261                  | 3.09454                   |
| 333   | 6.40                          | -1.85630                  | 3.00165                   |

**Table S6.** The specific values of R<sub>SEI</sub> of Li | Li symmetric cells at various temperatures for ESEI with activated.

| T (K) | R <sub>SEI</sub> ( $\Omega$ ) | ln (1/ R <sub>SEI</sub> ) | 1000/T (K <sup>-1</sup> ) |
|-------|-------------------------------|---------------------------|---------------------------|
| 303   | 24.88                         | -3.21406                  | 3.2987                    |
| 313   | 11.96                         | -2.48157                  | 3.19336                   |
| 323   | 6.59                          | -1.88555                  | 3.09454                   |
| 333   | 3.22                          | -1.16938                  | 3.00165                   |

**Table S7.** Full cells of ESEI compared with previously reported work.

| Capacity (mAh cm <sup>-2</sup> ) | Cycle Life | Electrolyte                                                              | Strategy                                             | Charge C-rate | Discharge C-rate | N/P          | Ref.          |
|----------------------------------|------------|--------------------------------------------------------------------------|------------------------------------------------------|---------------|------------------|--------------|---------------|
| 3.49                             | 160        | 1 M LiPF <sub>6</sub><br>EC/EMC+TSFSA                                    | Chemical reaction +<br>electrochemical<br>activation | C/5           | 1 C              | ~17          | This work     |
| 3.49                             | 115<br>260 | 1 M LiPF <sub>6</sub><br>EMC/FEC<br>+TSFSA                               | Chemical reaction +<br>electrochemical<br>activation | C/2<br>C/5    | C/2<br>1 C       | 0.89<br>2.98 | This work     |
| 6.4                              | 70         | 1 M LiPF <sub>6</sub><br>EMC/FEC<br>+TSFSA                               | Chemical reaction +<br>electrochemical<br>activation | 0.5 C         | 1 C              | 1.56         | This work     |
| 1.60                             | 150        | 1M LiPF <sub>6</sub><br>EC/DEC                                           | Artificial SEI                                       | 1 C           | 1 C              | >30          | <sup>1</sup>  |
| 4                                | 300        | 1 M LiPF <sub>6</sub><br>EC/EMC/FEC                                      | Artificial SEI                                       | C/5           | 1 C              | 2.5          | <sup>2</sup>  |
| 0.76                             | 300        | 1 M LiPF <sub>6</sub><br>EC/DEC/FEC/V<br>C                               | Artificial SEI                                       | 1 C           | 1 C              | 5.26         | <sup>6</sup>  |
| 3                                | 50         | 1M LiPF <sub>6</sub><br>EC/DEC/FEC                                       | Artificial SEI                                       | C/3           | C/3              | 1            | <sup>20</sup> |
| 3.67                             | 100        | 1M LiPF <sub>6</sub><br>EC/DEC/EMC                                       | Artificial SEI                                       | C/5           | 1 C              | 2.72         | <sup>21</sup> |
| 2.5                              | 250        | 1M LiPF <sub>6</sub><br>EC/DEC/FEC                                       | Artificial SEI                                       | C/5           | C/3              | 4            | <sup>22</sup> |
| 1.72                             | 200        | 1 M LiPF <sub>6</sub><br>EC/DMC/FEC<br>+DIDP+TMSF+<br>LiNO <sub>3</sub>  | Additive                                             | 1 C           | 1 C              | >100         | <sup>19</sup> |
| 3.4                              | 200        | 1 M LiPF <sub>6</sub><br>FEC/DMC+LiNO <sub>3</sub> +TPFPB                | Additive                                             | C/3           | C/3              | 2.71         | <sup>23</sup> |
| 2.5                              | 200        | 1 M LiPF <sub>6</sub><br>FEC/DMC+LiNO <sub>3</sub> +DMSO                 | Additive                                             | C/2           | C/2              | 4            | <sup>24</sup> |
| 4.0                              | 100        | 1M LiPF <sub>6</sub><br>EC/DMC/EMC                                       | Artificial SEI                                       | 0.5 C         | 0.5 C            | 2.49         | <sup>25</sup> |
| 3.5                              | 180        | 1.0 M LiTFSI<br>DOL/DME+LiNO <sub>3</sub>                                | Artificial SEI                                       | 0.3 C         | 0.3 C            | 2.33         | <sup>26</sup> |
| 2.5                              | 220        | 1.5 M LiTFSI<br>DME+ LiNO <sub>3</sub> +<br>CsNO <sub>3</sub>            | Additive                                             | 1 C           | 1 C to 2 C       | 2            | <sup>27</sup> |
| 2.55                             | 75         | LiFSI-PES=1:2.5<br>(mol.)                                                | Electrolyte                                          | 5 C           | 5 C              | 2.5          | <sup>28</sup> |
| 2.5                              | 150        | 1 M LiPF <sub>6</sub><br>EC/DEC/FEC+4<br>0% 3 M<br>TMP/LiNO <sub>3</sub> | Electrolyte                                          | 0.2 C         | 0.2 C            | 5            | <sup>29</sup> |

## References

1. R. Pathak, K. Chen, A. Gurung, K. M. Reza, B. Bahrami, J. Pokharel, A. Baniya, W. He, F. Wu, Y. Zhou, K. Xu and Q. Qiao, *Nature Communications*, 2020, **11**, 93.
2. Y. Xie, Y. Huang, Y. Zhang, T. Wu, S. Liu, M. Sun, B. Lee, Z. Lin, H. Chen, P. Dai, Z. Huang, J. Yang, C. Shi, D. Wu, L. Huang, Y. Hua, C. Wang and S. Sun, *Nature Communications*, 2023, **14**, 2883.
3. J. Pokharel, A. Cresce, B. Pant, M. Y. Yang, A. Gurung, W. He, A. Baniya, B. S. Lamsal, Z. Yang, S. Gent, X. Xian, Y. Cao, W. A. Goddard, 3rd, K. Xu and Y. Zhou, *Nature communications*, 2024, **15**, 3085-3085.
4. S. Ni, M. Zhang, C. Li, R. Gao, J. Sheng, X. Wu and G. Zhou, *Advanced Materials*, 2023, **35**, e2209028.
5. Z. Peng, J. Song, L. Huai, H. Jia, B. Xiao, L. Zou, G. Zhu, A. Martinez, S. Roy, V. Murugesan, H. Lee, X. Ren, Q. Li, B. Liu, X. Li, D. Wang, W. Xu and J.-G. Zhang, *Advanced Energy Materials*, 2019, **9**, 1901764.
6. S. Fang, F. Wu, S. Zhao, M. Zarrabeitia, G.-T. Kim, J.-K. Kim, N. Zhou and S. Passerini, *Advanced Energy Materials*, 2023, **13**, 2302577.
7. S. Sun, S. Myung, G. Kim, D. Lee, H. Son, M. Jang, E. Park, B. Son, Y.-G. Jung, U. Paik and T. Song, *Journal of Materials Chemistry A*, 2020, **8**, 17229-17237.
8. D. Kang, N. Hart, J. Koh, L. Ma, W. Liang, J. Xu, S. Sardar and J. P. Lemmon, *Energy Storage Materials*, 2020, **24**, 618-625.
9. D. Lee, S. Sun, H. Park, J. Kim, K. Park, I. Hwang, Y. Jung, T. Song and U. Paik, *Journal of Power Sources*, 2021, **506**, 230158.
10. Y. Wang, F. Liu, G. Fan, X. Qiu, J. Liu, Z. Yan, K. Zhang, F. Cheng and J. Chen, *Journal of the American Chemical Society*, 2021, **143**, 2829-2837.
11. X. Li, M. Lv, Y. Tian, L. Gao, T. Liu, Q. Zhou, Y. Xu, L. Shen, W. Shi, X. Li, Y. Lu, X. Liu and S. Xiao, *Nano Energy*, 2021, **87**, 106214.
12. Y. Qin, H. Wang, J. Zhou, R. Li, C. Jiang, Y. Wan, X. Wang, Z. Chen, X. Wang, Y. Liu, B. Guo and D. Wang, *Angewandte Chemie-International Edition*, 2024, DOI: 10.1002/anie.202402456.
13. J. Zhang, X. Yue, Z. Wu, Y. Chen, Y. Bai, K. Sun, Z. Wang and Z. Liang, *Nano Letters*, 2023, **23**, 9609-9617.
14. V. A. K. Adiraju, O. B. Chae, J. R. Robinson and B. L. Lucht, *Acs Energy Letters*, 2023, **8**, 2440-2446.
15. F. Li, J. Liu, J. He, Y. Hou, H. Wang, D. Wu, J. Huang and J. Ma, *Angewandte Chemie-International Edition*, 2022, **61**, e202205091.
16. P. Zhou, Y. Xia, W.-h. Hou, S. Yan, H.-Y. Zhou, W. Zhang, Y. Lu, P. Wang and K. Liu, *Nano Letters*, 2022, **22**, 5936-5943.
17. S. Gu, S.-W. Zhang, J. Han, Y. Deng, C. Luo, G. Zhou, Y. He, G. Wei, F. Kang, W. Lv and Q.-H. Yang, *Advanced Functional Materials*, 2021, **31**, 2102128.
18. A. Fu, J. Lin, Z. Zhang, C. Xu, Y. Zou, C. Liu, P. Yan, D.-Y. Wu, Y. Yang and J. Zheng, *Acs Energy Letters*, 2022, **7**, 1364-1373.
19. Y. Gao, G. Wu, W. Fang, Z. Qin, T. Zhang, J. Yan, Y. Zhong, N. Zhang and G. Chen, *Angewandte Chemie-International Edition*, 2024, DOI: 10.1002/anie.202403668.
20. S. Stalin, P. Chen, G. Li, Y. Deng, Z. Rouse, Y. Cheng, Z. Zhang, P. Biswal, S. Jin, S. P. Baker, R. Yang and L. A. Archer, *Matter*, 2021, **4**, 3753-3773.

21. S. Li, J. Huang, Y. Cui, S. Liu, Z. Chen, W. Huang, C. Li, R. Liu, R. Fu and D. Wu, *Nature Nanotechnology*, 2022, **17**, 613-621.
22. Z. Huang, J.-C. Lai, S.-L. Liao, Z. Yu, Y. Chen, W. Yu, H. Gong, X. Gao, Y. Yang, J. Qin, Y. Cui and Z. Bao, *Nature Energy*, 2023, **8**, 577-585.
23. S. Li, W. Zhang, Q. Wu, L. Fan, X. Wang, X. Wang, Z. Shen, Y. He and Y. Lu, *Angewandte Chemie-International Edition*, 2020, **59**, 14935-14941.
24. S. Liu, X. Ji, N. Piao, J. Chen, N. Eidson, J. Xu, P. Wang, L. Chen, J. Zhang, T. Deng, S. Hou, T. Jin, H. Wan, J. Li, J. Tu and C. Wang, *Angewandte Chemie-International Edition*, 2021, **60**, 3661-3671.
25. H. Dai, J. Dong, M. Wu, Q. Hu, D. Wang, L. Zuin, N. Chen, C. Lai, G. Zhang and S. Sun, *Angewandte Chemie-International Edition*, 2021, **60**, 19852-19859.
26. T. D. Pham, A. Bin Faheem, J. Kim, K. Kwak and K.-K. Lee, *Advanced Functional Materials*, 2023, **33**, 2305284
27. M. M. Rahman, S. Tan, Y. Yang, H. Zhong, S. Ghose, I. Waluyo, A. Hunt, L. Ma, X.-Q. Yang and E. Hu, *Nature Communications*, 2023, **14**, 8414.
28. J. Yu, X. Ma, X. Zou, Y. Hu, M. Yang, J. Yang, S. Sun and F. Yan, *Energy & Environmental Science*, 2024, **17**, 4519-4530.
29. Z. Wang, Y. Wang, B. Li, J. C. Bower, K. Davey, J. Lu and Z. Guo, *Angewandte Chemie-International Edition*, 2022, **61**, e202206682.
